# Supplementary material for: Chemical tuning of room-temperature ferrimagnetism and ferroelectricity in ε-Fe2O3-type multiferroic oxide thin films
Source: Royal Society of Chemistry journal article supplement (doi:10.1039/c7tc04363e), 2017-01-01
Supplement: c7tc04363e1.pdf [file c7tc04363e1.pdf]

Supporting information for

**Chemical Tuning of Room-temperature Ferrimagnetism and Ferroelectricity in  $\epsilon$ -Fe<sub>2</sub>O<sub>3</sub>-  
type Multiferroic Oxide Thin Films**

Tsukasa Katayama\*, Shintaro Yasui, Yosuke Hamasaki, Takuya Osakabe and Mitsuru Itoh

Laboratory for Materials and Structures Laboratory, Tokyo Institute of Technology, Midori-ku,  
Yokohama 226-8503, Japan

\*E-mail: katayama.t.ad@m.titech.ac.jp

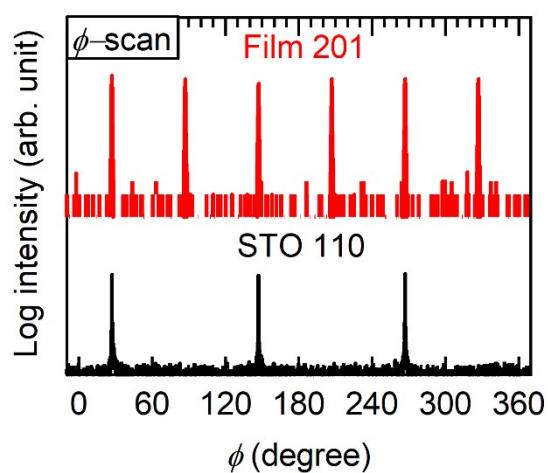

Figure S1.  $\phi$ -scan around film {201} and STO {110} diffraction peaks for the  $A = \text{Ga}$  film.

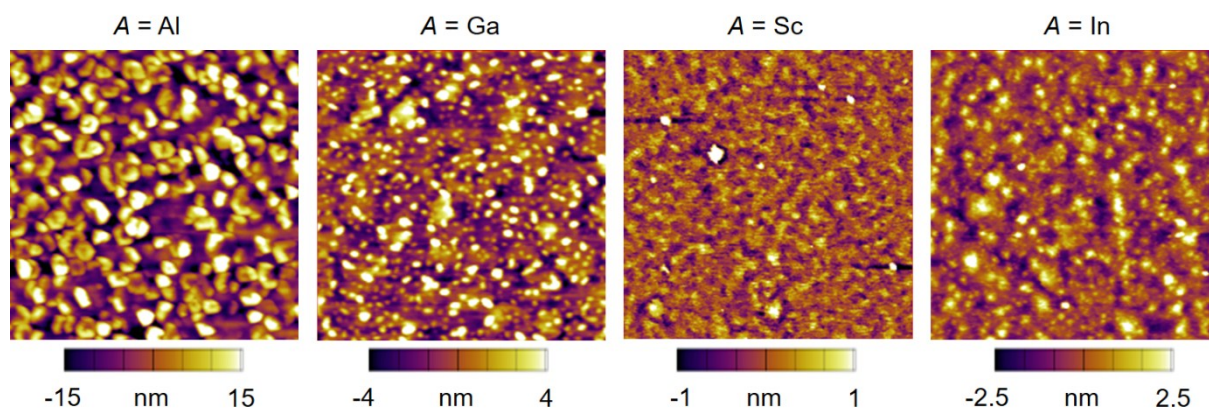

Figure S2. Surface morphology ( $4 \mu\text{m} \times 4 \mu\text{m}$  size) for the  $A_{0.2}\text{Ga}_{0.4}\text{Fe}_{1.4}\text{O}_3$  films ( $A = \text{Al}, \text{Ga}, \text{Sc}$  and  $\text{In}$ ).

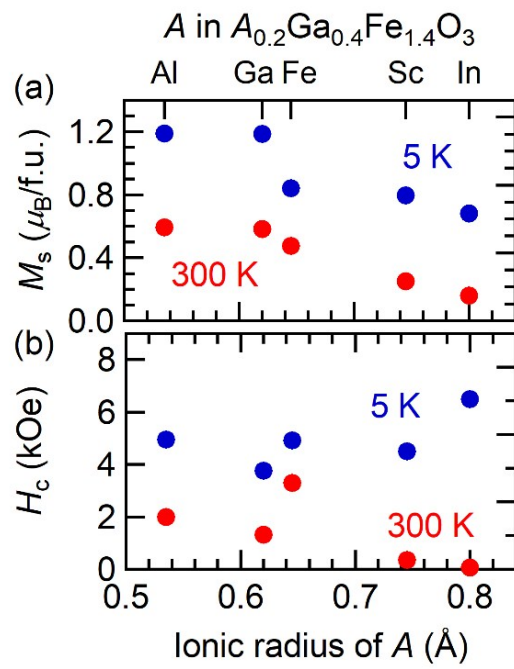

Figure S3. (a) Saturated magnetization ( $M_s$ ) and (b) coercive field at 5 and 300 K for the  $A_{0.2}Ga_{0.4}Fe_{1.4}O_3$  films ( $A = Al, Ga, Fe, Sc$  and  $In$ ) as a function of ionic radius of  $A$ .

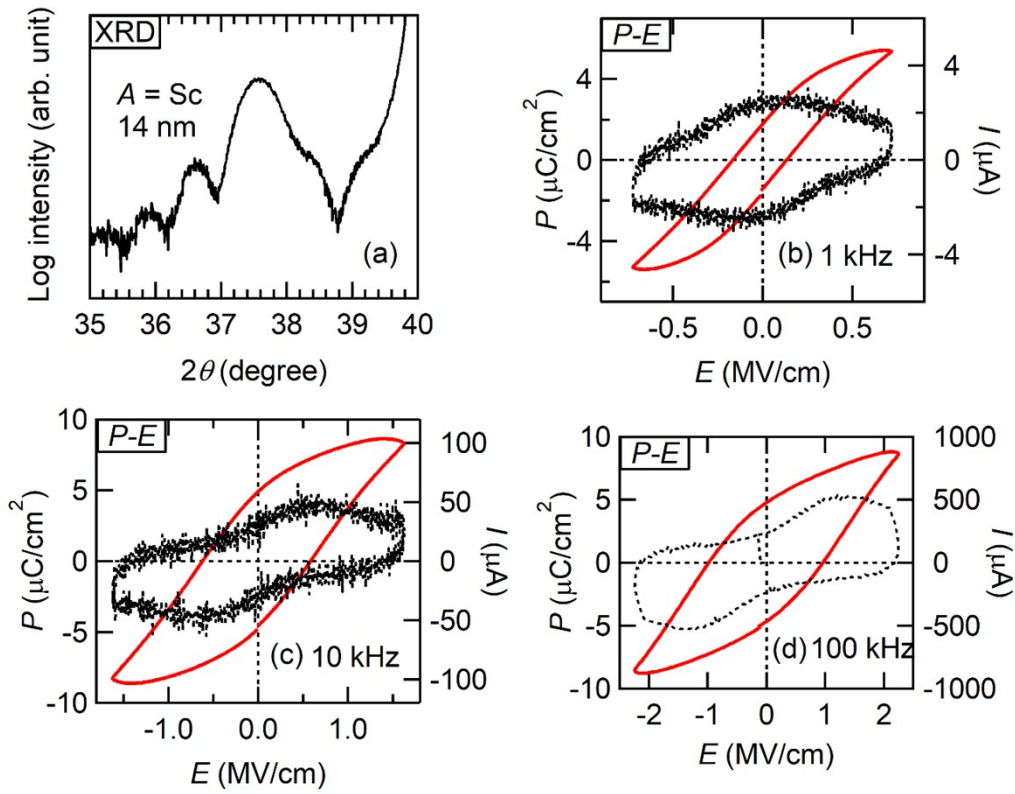

Figure S4. (a) XRD  $2\theta$ - $\theta$  pattern for the  $A = \text{Sc}$  film. From the fringe peaks, we decided that thickness of the film is 14 nm.  $P$ - $E$  and  $I$ - $E$  curves for the  $A = \text{Sc}$  film with thickness of 14 nm at room temperature at (b) 1, (c) 10, and (d) 100 kHz.

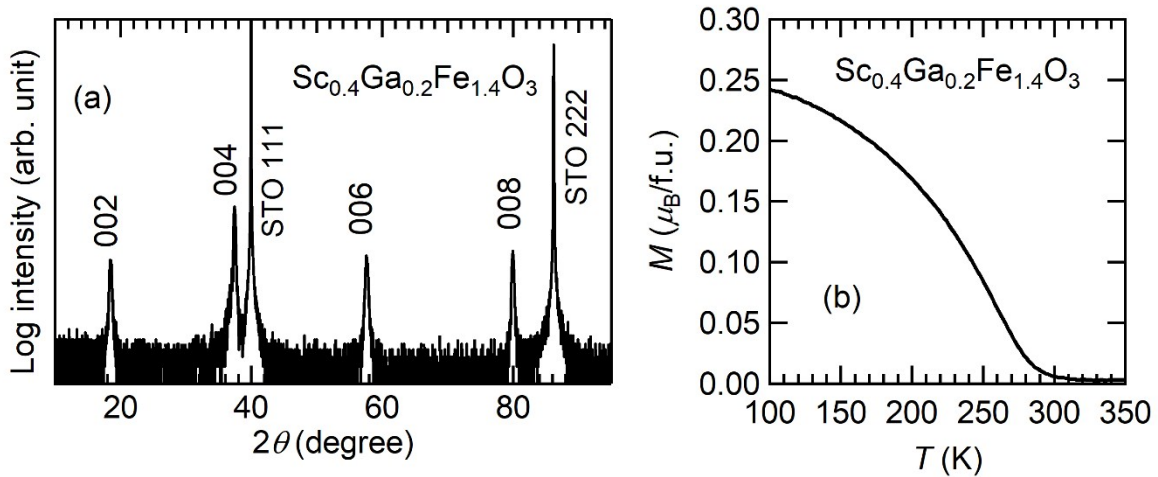

Figure S5. (a) XRD  $2\theta$ - $\theta$  pattern and (b)  $M$ - $T$  curve for the  $\text{Sc}_{0.4}\text{Ga}_{0.2}\text{Fe}_{1.4}\text{O}_3$  film. The  $T_C$  value is below 300 K.
